# Supplementary material
Source: publisher figshare collection journal article supplement (https://wiley.figshare.com/articles/dataset/_/3514541)
Supplement: Supplementary file 1 [file 1 › appendix-A.htm]

Ecological Archives A019-072-A1


### *Ecological Archives* A019-072-A1

### **Stephen C. Newbold and Juha V. Siikamäki. 2009. Prioritizing conservation activities using reserve site selection methods and population viability analysis. *Ecological Applications* 19:1774–1790.**

Appendix A. Pollution-loading model: derivation/description of pollution-loading model used to quantify impacts of human land use patterns on in-stream salmon habitat productivity.

> View / download PDF.

---


[Back to A019-072]
